# Supplementary material for: Ni–Co–Mn complexed 3,4,9,10-perylenetetracarboxylic acid complexes as novel organic electrode materials for lithium-ion batteries
Source: Royal Society of Chemistry journal article supplement (doi:10.1039/d3dt03559j), 2023-12-19
Supplement: d3dt03559j1.pdf [file d3dt03559j1.pdf]

## Supporting Information

### Ni-Co-Mn complexed 3,4,9,10-perylene tetracarboxylic acid complexes as novel organic electrode material for lithium-ion batteries

<sup>1</sup>Wenfeng Yuan<sup>[a]</sup>, <sup>1</sup>Mengqian Xu<sup>[a]</sup>, Lucheng Li<sup>[a]</sup>, Nei Chen<sup>[a]</sup>, Jun Chen\*<sup>[a]</sup>, Qian Zhang<sup>[a, b]</sup>

<sup>[a]</sup> Jiangxi Key Laboratory of Power Batteries and Materials, Faculty of Materials Metallurgy and Chemistry,

Jiangxi University of Sciences and Technology, Ganzhou 341000. China, E-mail: [chenjun@jxust.edu.cn](mailto:chenjun@jxust.edu.cn)

<sup>1</sup> Co-first author

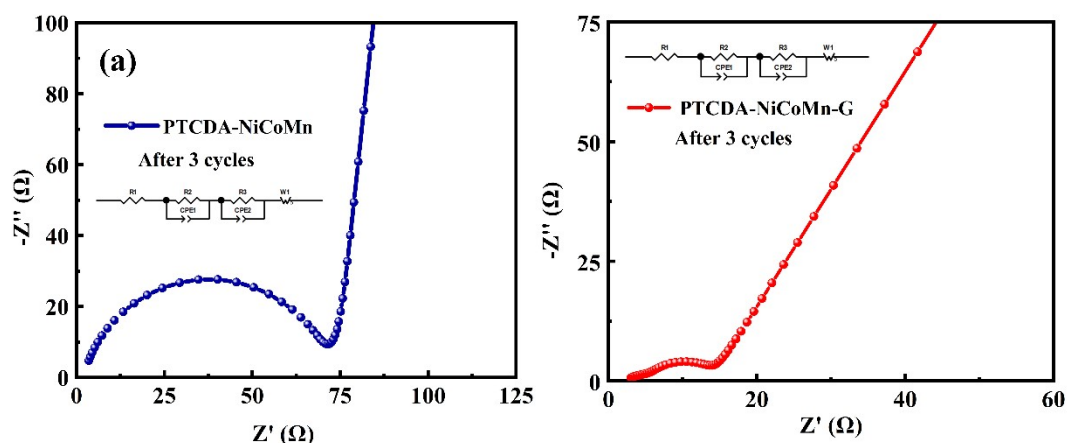

**Fig. S1** (a) AC impedance curve of PTCDA-NiCoMn after 3 turns of polarization; (b) AC impedance curve of PTCDA-NiCoMn-G after 3 turns of polarization

**Table S1** Impedance fitting data for materials

| Samples                 | $R_1$ (Ω) | $R_2$ (Ω) | $R_3$ (Ω) |
|-------------------------|-----------|-----------|-----------|
| 3 Cycles PTCDA-NiCoMn   | 4.257     | 3.501     | 42.86     |
| 3 Cycles PTCDA-NiCoMn-G | 2.376     | 3.889     | 7.545     |

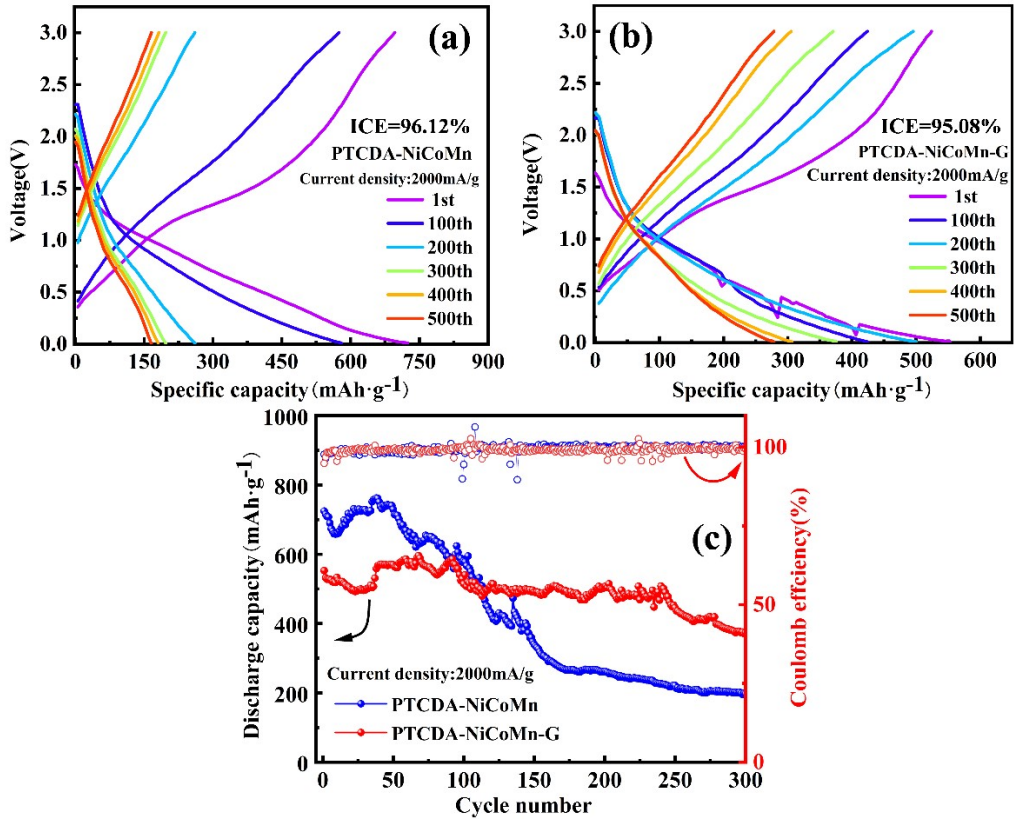

Fig. S2 (a) charge/discharge curves of PTCDA-NiCoMn electrode at 2000 mA g<sup>-1</sup> current density; (b) charge/discharge curves of PTCDA-NiCoMn-G electrode at 2000 mA g<sup>-1</sup> current density; (c) cycling performance of PTCDA-NiCoMn and PTCDA-NiCoMn-G electrodes at 2000 mA g<sup>-1</sup> current density

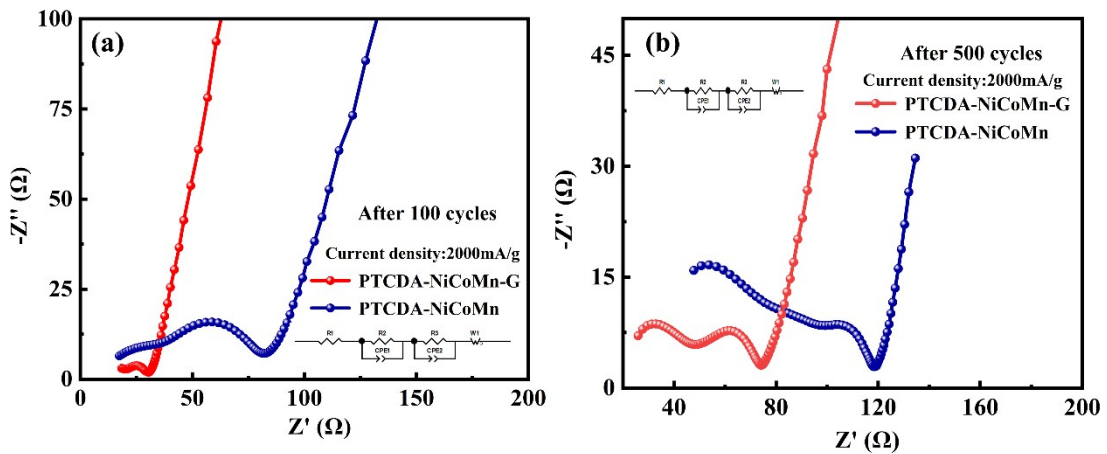

Fig. S3 (a) AC impedance curves of PTCDA-NiCoMn and PTCDA-NiCoMn-G electrodes after 100 cycles; (b)

AC impedance curves of both electrodes after 500 cycles

**Table S2** Impedance fitting data for PTCDA-NiCoMn and PTCDA-NiCoMn-G electrodes

|            | Samples        | $R_1$ ( $\Omega$ ) | $R_2$ ( $\Omega$ ) | $R_3$ ( $\Omega$ ) |
|------------|----------------|--------------------|--------------------|--------------------|
| 100 Cycles | PTCDA-NiCoMn   | 15.98              | 19.68              | 46.06              |
|            | PTCDA-NiCoMn-G | 16.89              | 3.67               | 9.60               |
| 500 Cycles | PTCDA-NiCoMn   | 47.10              | 53.01              | 18.27              |
|            | PTCDA-NiCoMn-G | 25.83              | 22.28              | 25.66              |

**Table S3** Discharge capacity contributed from PTCDA-NiCoMn at different potentials (The voltage window is 0.01-3 V at 0.1 V intervals, C: discharge capacity, mAh·g<sup>-1</sup>, V: voltage, V)

| PTCDA-NiCoMn          |      |                        |     |                         |     |                         |     |
|-----------------------|------|------------------------|-----|-------------------------|-----|-------------------------|-----|
| 4 <sup>th</sup> cycle |      | 50 <sup>th</sup> cycle |     | 125 <sup>th</sup> cycle |     | 200 <sup>th</sup> cycle |     |
| C                     | V    | C                      | V   | C                       | V   | C                       | V   |
| 0                     | 3.0  | 0                      | 3.0 | 0                       | 3.0 | 0                       | 3.0 |
| 0                     | 2.9  | 0                      | 2.9 | 0                       | 2.9 | 0                       | 2.9 |
| 0                     | 2.8  | 0                      | 2.8 | 0                       | 2.8 | 0                       | 2.8 |
| 0                     | 2.7  | 1.9                    | 2.7 | 0                       | 2.7 | 0                       | 2.7 |
| 1.1                   | 2.6  | 5.5                    | 2.6 | 0.3                     | 2.6 | 0.3                     | 2.6 |
| 2.5                   | 2.5  | 10.8                   | 2.5 | 2.2                     | 2.5 | 2.5                     | 2.5 |
| 4.2                   | 2.4  | 17.2                   | 2.4 | 5.8                     | 2.4 | 6.2                     | 2.4 |
| 6.7                   | 2.3  | 23.3                   | 2.3 | 10.5                    | 2.3 | 11.3                    | 2.3 |
| 10                    | 2.2  | 29.1                   | 2.2 | 15.8                    | 2.2 | 16.4                    | 2.2 |
| 15                    | 2.1  | 34.6                   | 2.1 | 21.1                    | 2.1 | 22.1                    | 2.1 |
| 21.6                  | 2.0  | 40.2                   | 2.0 | 26.6                    | 2.0 | 27.8                    | 2.0 |
| 29.9                  | 1.9  | 45.7                   | 1.9 | 32.1                    | 1.9 | 33.7                    | 1.9 |
| 39.3                  | 1.8  | 51.8                   | 1.8 | 38.5                    | 1.8 | 40.3                    | 1.8 |
| 48.8                  | 1.7  | 58.4                   | 1.7 | 46                      | 1.7 | 47.4                    | 1.7 |
| 58.5                  | 1.6  | 66.2                   | 1.6 | 54                      | 1.6 | 55.9                    | 1.6 |
| 70.4                  | 1.5  | 75.9                   | 1.5 | 63.1                    | 1.5 | 65.5                    | 1.5 |
| 87.8                  | 1.4  | 88.3                   | 1.4 | 74.5                    | 1.4 | 77.4                    | 1.4 |
| 113.3                 | 1.3  | 105.8                  | 1.3 | 89.5                    | 1.3 | 91.6                    | 1.3 |
| 151                   | 1.2  | 129.9                  | 1.2 | 109.4                   | 1.2 | 109.7                   | 1.2 |
| 196.4                 | 1.1  | 164.3                  | 1.1 | 132.1                   | 1.1 | 131                     | 1.1 |
| 250.2                 | 1.0  | 209.7                  | 1.0 | 161.4                   | 1.0 | 156.8                   | 1.0 |
| 314.2                 | 0.9  | 260.6                  | 0.9 | 196.1                   | 0.9 | 185.1                   | 0.9 |
| 382                   | 0.8  | 314.9                  | 0.8 | 231.2                   | 0.8 | 216.3                   | 0.8 |
| 445.8                 | 0.70 | 0.7                    | 0.7 | 264.2                   | 0.7 | 249                     | 0.7 |
| 509.5                 | 0.6  | 442.9                  | 0.6 | 316.8                   | 0.6 | 285.8                   | 0.6 |
| 572.6                 | 0.5  | 513.5                  | 0.5 | 367.8                   | 0.5 | 326.1                   | 0.5 |
| 642.2                 | 0.4  | 585.2                  | 0.4 | 422.3                   | 0.4 | 371.2                   | 0.4 |
| 723.1                 | 0.3  | 658.6                  | 0.3 | 486.8                   | 0.3 | 420.2                   | 0.3 |

|        |      |         |      |       |      |       |      |
|--------|------|---------|------|-------|------|-------|------|
| 828.4  | 0.2  | 755.2   | 0.2  | 558.6 | 0.2  | 475.9 | 0.2  |
| 976.3  | 0.1  | 874.6   | 0.1  | 645.8 | 0.1  | 541.2 | 0.1  |
| 1218.8 | 0.01 | 1051.20 | 0.01 | 761   | 0.01 | 622.6 | 0.01 |

**Table S4** Total capacity attenuation over different cyclic ranges and the attenuation ratio of C=O, C=C, benzene ring correspondence

| <b>Cycle range</b> | <b>Total capacity attenuation, mAh·g<sup>-1</sup></b> | <b>Capacity attenuation (C=O), mAh·g<sup>-1</sup></b> | <b>Percentage</b> | <b>Capacity attenuation (C=C), mAh·g<sup>-1</sup></b> | <b>Percentage</b> | <b>Capacity attenuation (benzene ring), mAh·g<sup>-1</sup></b> | <b>Percentage</b> |
|--------------------|-------------------------------------------------------|-------------------------------------------------------|-------------------|-------------------------------------------------------|-------------------|----------------------------------------------------------------|-------------------|
| 20-50              | 167.6                                                 | 51.52                                                 | 30.74%            | 38.64                                                 | 23.05%            | 77.3                                                           | 46.21 %           |
| 50-125             | 290.2                                                 | 89.28                                                 | 30.76%            | 67.32                                                 | 23.19%            | 133.92                                                         | 46.14%            |
| 125-200            | 138.4                                                 | 42.57                                                 | 30.76%            | 31.59                                                 | 22,82%            | 63.89                                                          | 46.16%            |
